# Supplementary material for: Rapid microwave synthesis of high aspect-ratio ZnO nanotetrapods for swift bisphenol A detection
Source: Royal Society of Chemistry journal article supplement (doi:10.1039/c3an00336a), 2013-01-01
Supplement: c3an00336a.pdf [file c3an00336a.pdf]

## Supporting information

### Figure captions

Figure 1: XRD pattern of ZnO nanotetrapods synthesized by microwave evaporation.

Figure 2: Cyclic voltammogram of fabricated sensor T-ZnO/GCE in phosphate buffer pH 8.0; scan rate 20 mVs<sup>-1</sup>.

Figure 3: Nyquist plots obtained at GCE (curve b) and T-ZnO/GCE (curve c) in 1.0 mM K<sub>3</sub>[Fe(CN)<sub>6</sub>].

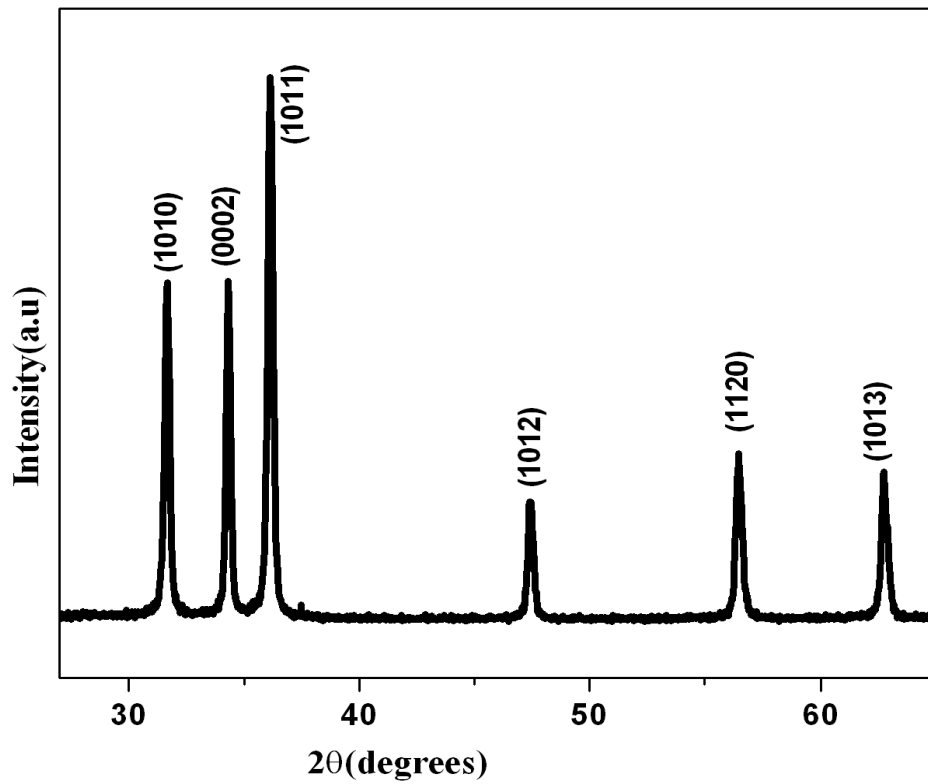

Figure 1

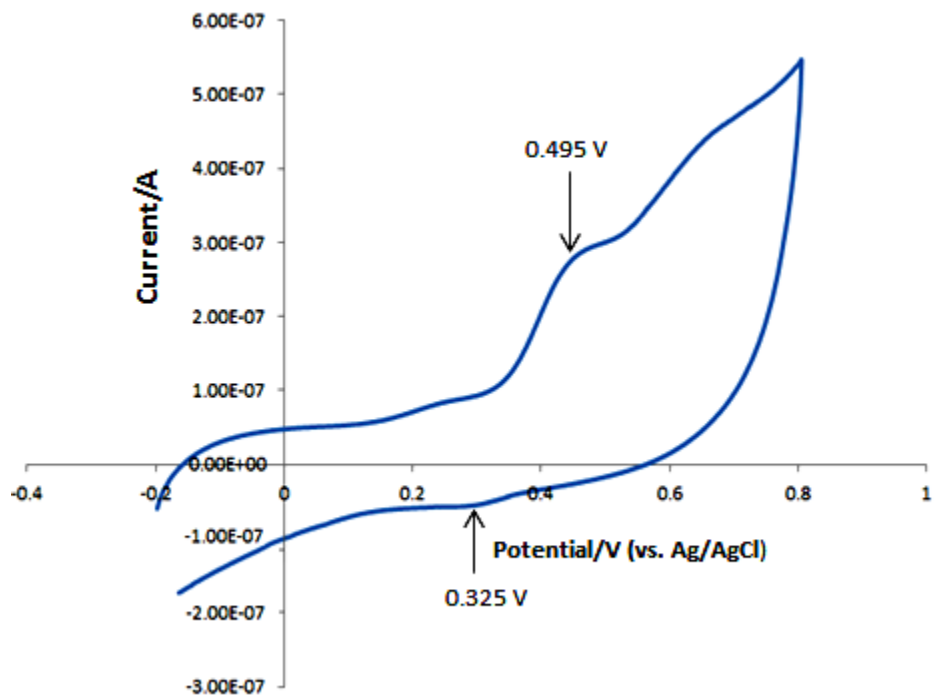

Figure 2

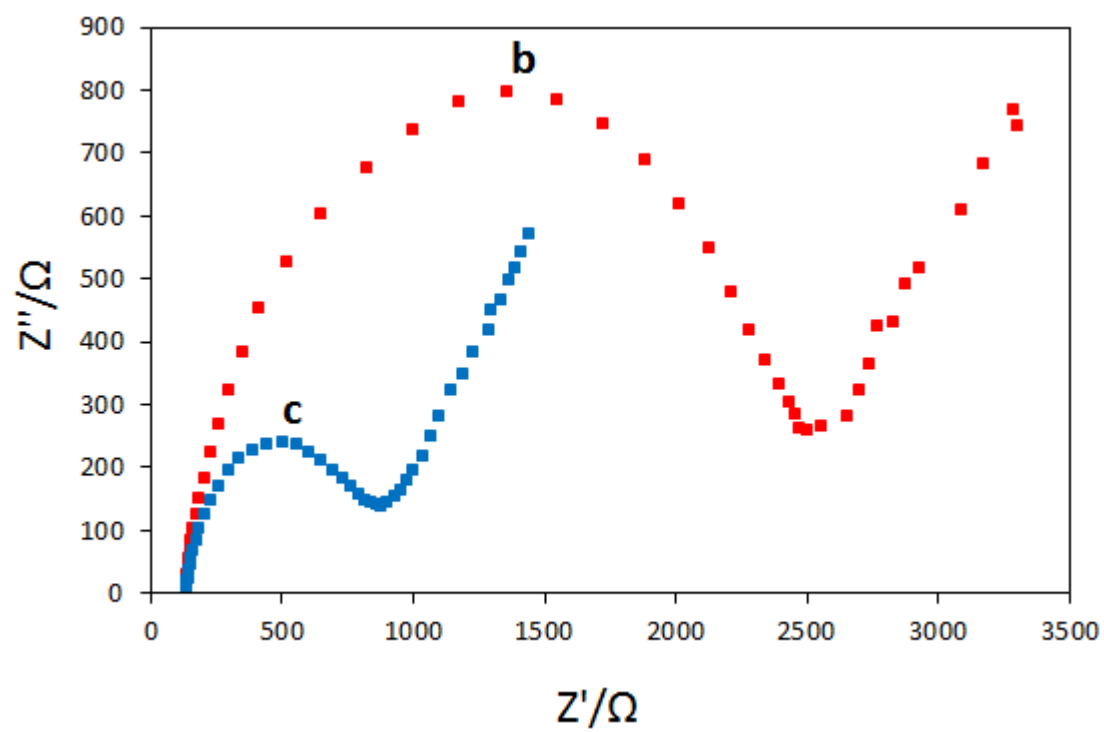

Figure 3
